# Supplementary material for: COVID-19 awareness, knowledge and perception towards digital health in an urban multi-ethnic Asian population
Source: PubMed Central journal article supplement (PMC8144201; doi:10.1038/s41598-021-90098-6), 2021-05-24

**COVID-19 Awareness, Knowledge and Perception towards Digital Health in an Urban  
Multi-Ethnic Asian Population.**

Cong Ling Teo, BSc<sup>1\*</sup>, Miao Li Chee, BSc<sup>1\*</sup>, Kai Hui Koh, BSc<sup>1</sup>, Rachel Marjorie Wei Wen Tseng, BA<sup>1</sup>, Shivani Majithia, OD<sup>1</sup>, Sahil Thakur, MBBS<sup>1</sup>, Dinesh Visva Gunasekeran, MD<sup>3</sup>, Simon Nusinovici, PhD<sup>1</sup>, Charumathi Sabanayagam MD PhD<sup>1,2</sup>, Tien Yin Wong, MD PhD<sup>1,2,3</sup>, Yih-Chung Tham, PhD<sup>1,2\*</sup> Ching-Yu Cheng, MD MPH PhD<sup>1,2,3\*</sup>

<sup>1</sup> Singapore Eye Research Institute, Singapore National Eye Centre, Singapore.

<sup>2</sup> Duke-NUS Medical School, Singapore.

<sup>3</sup> Department of Ophthalmology, Yong Loo Lin School of Medicine, National University of Singapore and National University Health System, Singapore.

\*These authors contributed equally: Cong Ling Teo & Miao Li Chee. These authors jointly supervised this work: Yih-Chung Tham & Ching-Yu Cheng.

**Running title:** Health Literacy and Digital acceptance amidst COVID-19 among Elderly Asians.

**Keywords:** COVID-19; Health Literacy; Digital Acceptance; Asians.

**Correspondence author:**

Dr Yih-Chung Tham & Professor Ching-Yu Cheng  
Singapore Eye Research Institute, The Academia, 20 College Road, Discovery Tower Level 6, Singapore, 169856, Singapore.

**E-mail:** [tham.yih.chung@seri.com.sg](mailto:tham.yih.chung@seri.com.sg) & [chingyu.cheng@duke-nus.edu.sg](mailto:chingyu.cheng@duke-nus.edu.sg).

**Tel:** +65 6576 7277; **Fax:** +65 6576 7277

**Supplementary Table 1:** Knowledge, attitude, preparedness and digital health acceptance toward COVID-19 in each ethnic group.

|                                                                                                                                                                                            | Malays (n=177) | Indians (n=171) | Chinese (n=175) | P      |
|--------------------------------------------------------------------------------------------------------------------------------------------------------------------------------------------|----------------|-----------------|-----------------|--------|
| <b>(a) COVID-19 awareness and concern</b>                                                                                                                                                  |                |                 |                 |        |
| <b>On a scale of 1 to 10, how serious of a public health threat do you think the COVID-19 is or might become? (1 being no threat at all, 10 being a very serious public health threat)</b> | 8 ± 1.8        | 7 ± 3           | 7.6 ± 2.3       | <0.001 |
| <b>How worried are you about getting the COVID-19?</b>                                                                                                                                     |                |                 |                 |        |
| Very worried                                                                                                                                                                               | 63 (35.6)      | 49 (28.7)       | 63 (36.0)       | <0.001 |
| A little worried                                                                                                                                                                           | 82 (46.3)      | 25 (14.6)       | 77 (44.0)       |        |
| Not worried at all                                                                                                                                                                         | 32 (18.1)      | 97 (56.7)       | 35 (20.0)       |        |
| <b>Do you think that you will get sick from the COVID-19?</b>                                                                                                                              |                |                 |                 |        |
| I definitely will                                                                                                                                                                          | 24 (13.6)      | 18 (10.5)       | 39 (22.3)       | <0.001 |
| I probably will                                                                                                                                                                            | 38 (21.5)      | 26 (15.2)       | 49 (28.0)       |        |
| Neutral                                                                                                                                                                                    | 75 (42.4)      | 16 (9.4)        | 47 (26.9)       |        |
| Not at all                                                                                                                                                                                 | 40 (22.6)      | 111 (64.9)      | 40 (22.9)       |        |
| <b>How likely do you think it is that someone you know may get sick from the COVID-19 this year?</b>                                                                                       |                |                 |                 |        |
| Very likely                                                                                                                                                                                | 11 (6.2)       | 10 (5.8)        | 13 (7.4)        | <0.001 |
| Somewhat likely                                                                                                                                                                            | 20 (11.3)      | 17 (9.9)        | 23 (13.1)       |        |
| Neutral                                                                                                                                                                                    | 86 (48.6)      | 6 (3.5)         | 64 (36.6)       |        |
| Somewhat unlikely                                                                                                                                                                          | 24 (13.6)      | 4 (2.3)         | 32 (18.3)       |        |
| Not at all likely                                                                                                                                                                          | 36 (20.3)      | 134 (78.4)      | 43 (24.6)       |        |
| <b>(b) COVID-19 knowledge</b>                                                                                                                                                              |                |                 |                 |        |
| <b>Are you aware that COVID-19 carriers can be asymptomatic? For example, absence of running nose, cough, fever or appearing to be fine.</b>                                               |                |                 |                 |        |

|                                                                                                                                                                                                                                         |            |            |            |        |
|-----------------------------------------------------------------------------------------------------------------------------------------------------------------------------------------------------------------------------------------|------------|------------|------------|--------|
| Yes                                                                                                                                                                                                                                     | 139 (78.5) | 114 (66.7) | 142 (81.1) | 0.013  |
| Unsure                                                                                                                                                                                                                                  | 23 (13.0)  | 37 (21.6)  | 17 (9.7)   |        |
| No                                                                                                                                                                                                                                      | 15 (8.5)   | 20 (11.7)  | 16 (9.1)   |        |
| <b>On a scale of 1 to 10, how likely do you think a person who is infected by COVID-19 will display no symptoms or mild symptoms? e.g. mild cough, itchy throat and mild fever. (1 being not at all likely, 10 being a very likely)</b> | 5.3 ± 1.8  | 4.8 ± 2.5  | 5.8 ± 2.4  | <0.001 |
| <b>On a scale of 1 to 10, how likely do you think a person who get COVID-19 will die as a result? (1 being not at all likely, 10 being a very likely)</b>                                                                               | 6.3 ± 2    | 3.4 ± 2.8  | 5.5 ± 2.5  | <0.001 |
| <b>Which of the following do you think are important prevention methods for the COVID-19?:</b>                                                                                                                                          |            |            |            |        |
| <b>Wear a mask (as long as you leave the house)</b>                                                                                                                                                                                     |            |            |            |        |
| Yes                                                                                                                                                                                                                                     | 174 (98.3) | 168 (98.2) | 169 (96.6) | 0.199  |
| Unsure                                                                                                                                                                                                                                  | 0 (0.0)    | 0 (0.0)    | 3 (1.7)    |        |
| No                                                                                                                                                                                                                                      | 3 (1.7)    | 3 (1.8)    | 3 (1.7)    |        |
| <b>Keep a minimum of 1m apart from other public members</b>                                                                                                                                                                             |            |            |            |        |
| Yes                                                                                                                                                                                                                                     | 171 (96.6) | 166 (97.1) | 165 (94.3) | 0.224  |
| Unsure                                                                                                                                                                                                                                  | 0 (0.0)    | 1 (0.6)    | 4 (2.3)    |        |
| No                                                                                                                                                                                                                                      | 6 (3.4)    | 4 (2.3)    | 6 (3.4)    |        |
| <b>Wash your hands frequently</b>                                                                                                                                                                                                       |            |            |            |        |
| Yes                                                                                                                                                                                                                                     | 175 (98.9) | 167 (97.7) | 167 (95.4) | 0.233  |
| Unsure                                                                                                                                                                                                                                  | 1 (0.6)    | 0 (0.0)    | 2 (1.1)    |        |
| No                                                                                                                                                                                                                                      | 1 (0.6)    | 4 (2.3)    | 6 (3.4)    |        |
| <b>Stay at home as much as possible</b>                                                                                                                                                                                                 |            |            |            |        |
| Yes                                                                                                                                                                                                                                     | 168 (94.9) | 165 (96.5) | 159 (90.9) | 0.105  |

|                                                                                                                          |            |            |            |        |
|--------------------------------------------------------------------------------------------------------------------------|------------|------------|------------|--------|
| Unsure                                                                                                                   | 3 (1.7)    | 0 (0.0)    | 6 (3.4)    |        |
| No                                                                                                                       | 6 (3.4)    | 6 (3.5)    | 10 (5.7)   |        |
| <b>Avoid touching your face, eyes, nose and mouth</b>                                                                    |            |            |            |        |
| Yes                                                                                                                      | 171 (96.6) | 153 (89.5) | 159 (90.9) | 0.004  |
| Unsure                                                                                                                   | 3 (1.7)    | 2 (1.2)    | 8 (4.6)    |        |
| No                                                                                                                       | 3 (1.7)    | 16 (9.4)   | 8 (4.6)    |        |
| <b>(c) Information sources on COVID-19</b>                                                                               |            |            |            |        |
| <b>Where do you get information about COVID-19? (Check all that apply)</b>                                               |            |            |            |        |
| TV                                                                                                                       | 162 (91.5) | 149 (87.1) | 161 (92.0) | 0.244  |
| Newspaper                                                                                                                | 82 (46.3)  | 60 (35.1)  | 118 (67.4) | <0.001 |
| Radio                                                                                                                    | 85 (48.0)  | 50 (29.2)  | 42 (24.0)  | <0.001 |
| Family and Friends                                                                                                       | 100 (56.5) | 29 (17.0)  | 79 (45.1)  | <0.001 |
| Posters/Leaflets                                                                                                         | 3 (1.7)    | 2 (1.2)    | 24 (13.7)  | <0.001 |
| Hospital/Polyclinic/GP                                                                                                   | 1 (0.6)    | 0 (0.0)    | 13 (7.4)   | <0.001 |
| Internet/ Sharing on Social Media<br>(Facebook/Twitter/etc)                                                              | 35 (19.8)  | 32 (18.7)  | 69 (39.4)  | <0.001 |
| Sharing on messaging applications (Whatsapp/ etc)                                                                        | 18 (10.2)  | 32 (18.7)  | 70 (40.0)  | <0.001 |
| <b>(d) Preparedness</b>                                                                                                  |            |            |            |        |
| <b>How confident are you that Singapore government can prevent a further widespread outbreak in our local community?</b> |            |            |            |        |
| Very confident                                                                                                           | 123 (69.5) | 136 (79.5) | 104 (59.4) | <0.001 |
| Somewhat confident                                                                                                       | 36 (20.3)  | 12 (7.0)   | 43 (24.6)  |        |
| Neutral                                                                                                                  | 17 (9.6)   | 15 (8.8)   | 24 (13.7)  |        |
| Not very confident                                                                                                       | 0 (0.0)    | 5 (2.9)    | 3 (1.7)    |        |
| Not confident at all                                                                                                     | 1 (0.6)    | 3 (1.8)    | 1 (0.6)    |        |
| <b>How prepared do you think you are if there were to be a further widespread outbreak in the local community?</b>       |            |            |            |        |

|                        |           |            |           |        |
|------------------------|-----------|------------|-----------|--------|
| Very prepared          | 27 (15.3) | 126 (73.7) | 40 (22.9) | <0.001 |
| Somewhat prepared      | 73 (41.2) | 19 (11.1)  | 61 (34.9) |        |
| Neutral                | 69 (39.0) | 16 (9.4)   | 53 (30.3) |        |
| Not very well prepared | 3 (1.7)   | 8 (4.7)    | 11 (6.3)  |        |
| Not prepared at all    | 5 (2.8)   | 2 (1.2)    | 10 (5.7)  |        |

### **(e) General Health, well-being Questionnaire**

#### **How much has the COVID-19 changed your daily routine?**

|            |           |           |           |        |
|------------|-----------|-----------|-----------|--------|
| A lot      | 39 (22.0) | 55 (32.2) | 65 (37.1) | <0.001 |
| Moderate   | 28 (15.8) | 31 (18.1) | 53 (30.3) |        |
| A little   | 71 (40.1) | 28 (16.4) | 40 (22.9) |        |
| Not at all | 39 (22.0) | 57 (33.3) | 17 (9.7)  |        |

#### **Lose much sleep**

|                        |            |            |            |        |
|------------------------|------------|------------|------------|--------|
| Less than usual        | 50 (28.2)  | 3 (1.8)    | 4 (2.3)    | <0.001 |
| No more than usual     | 123 (69.5) | 153 (89.5) | 134 (76.6) |        |
| Rather more than usual | 4 (2.3)    | 12 (7.0)   | 28 (16.0)  |        |
| Much more than usual   | 0 (0.0)    | 3 (1.8)    | 9 (5.1)    |        |

#### **Feel under stress**

|                        |            |            |            |        |
|------------------------|------------|------------|------------|--------|
| Less than usual        | 53 (29.9)  | 6 (3.5)    | 3 (1.7)    | <0.001 |
| No more than usual     | 110 (62.1) | 138 (80.7) | 115 (65.7) |        |
| Rather more than usual | 8 (4.5)    | 18 (10.5)  | 49 (28.0)  |        |
| Much more than usual   | 6 (3.4)    | 9 (5.3)    | 8 (4.6)    |        |

#### **Feel unable to 'face up' to problems encountered**

|                    |            |            |            |        |
|--------------------|------------|------------|------------|--------|
| Less than usual    | 53 (29.9)  | 4 (2.3)    | 2 (1.1)    | <0.001 |
| No more than usual | 119 (67.2) | 160 (93.6) | 142 (81.1) |        |

|                                   |            |            |            |        |
|-----------------------------------|------------|------------|------------|--------|
| Rather more than usual            | 4 (2.3)    | 4 (2.3)    | 22 (12.6)  |        |
| Much more than usual              | 1 (0.6)    | 3 (1.8)    | 9 (5.1)    |        |
| <b>Feel unhappy and depressed</b> |            |            |            |        |
| Less than usual                   | 51 (28.8)  | 9 (5.3)    | 4 (2.3)    | <0.001 |
| No more than usual                | 113 (63.8) | 138 (80.7) | 112 (64.0) |        |
| Rather more than usual            | 12 (6.8)   | 17 (9.9)   | 49 (28.0)  |        |
| Much more than usual              | 1 (0.6)    | 7 (4.1)    | 10 (5.7)   |        |

### **(f) Assessment on Individual Acceptance towards Digital Health**

**Before the COVID-19 outbreak, have you used any of these 'digital medical services' for a doctor consultation or follow-up for test results? (Check all that apply)**

|                                                                            |            |            |            |       |
|----------------------------------------------------------------------------|------------|------------|------------|-------|
| None at all                                                                | 174 (98.3) | 169 (98.8) | 170 (97.1) | 0.501 |
| Messaging applications with doctors (for example, Whatsapp/ SMS text chat) | 2 (1.1)    | 2 (1.2)    | 4 (2.3)    | 0.607 |
| Video consultation with doctors                                            | 1 (0.6)    | 0 (0.0)    | 2 (1.1)    | 0.371 |

**Do you agree that the digital medical services mentioned in the previous question may be helpful to reduce non-essential contact between patients and doctors/health care providers?**

|        |           |           |            |        |
|--------|-----------|-----------|------------|--------|
| Yes    | 97 (54.8) | 63 (36.8) | 113 (64.6) | <0.001 |
| Unsure | 60 (33.9) | 38 (22.2) | 45 (25.7)  |        |
| No     | 20 (11.3) | 70 (40.9) | 17 (9.7)   |        |

**In your opinion, if the COVID-19 pandemic continues, how likely will you use these digital medical services (video consultation with doctors, Whatsapp/ SMS text chat)**

|                   |           |           |           |        |
|-------------------|-----------|-----------|-----------|--------|
| Very likely       | 9 (5.1)   | 23 (13.5) | 17 (9.7)  | <0.001 |
| Somewhat likely   | 22 (12.4) | 28 (16.4) | 33 (18.9) |        |
| Neutral           | 31 (17.5) | 13 (7.6)  | 56 (32)   |        |
| Somewhat unlikely | 11 (6.2)  | 13 (7.6)  | 9 (5.1)   |        |

|                                                                                                                                                                       |            |           |           |        |
|-----------------------------------------------------------------------------------------------------------------------------------------------------------------------|------------|-----------|-----------|--------|
| Not at all likely                                                                                                                                                     | 104 (58.8) | 94 (55.0) | 60 (34.3) |        |
| <b>If the COVID-19 pandemic continues, how comfortable are you to use software/AI systems to interpret your medical tests/scans and provide advice automatically?</b> |            |           |           |        |
| Very comfortable                                                                                                                                                      | 4 (2.3)    | 26 (15.2) | 18 (10.3) | <0.001 |
| Somewhat comfortable                                                                                                                                                  | 13 (7.3)   | 27 (15.8) | 28 (16.0) |        |
| Neutral                                                                                                                                                               | 40 (22.6)  | 15 (8.8)  | 47 (26.8) |        |
| Somewhat uncomfortable                                                                                                                                                | 17 (9.6)   | 7 (4.1)   | 17 (9.7)  |        |
| Not at all comfortable                                                                                                                                                | 103 (58.2) | 96 (56.1) | 65 (37.1) |        |

**Supplementary Figure 1:** Summary of respondents' COVID-19 awareness and concern.

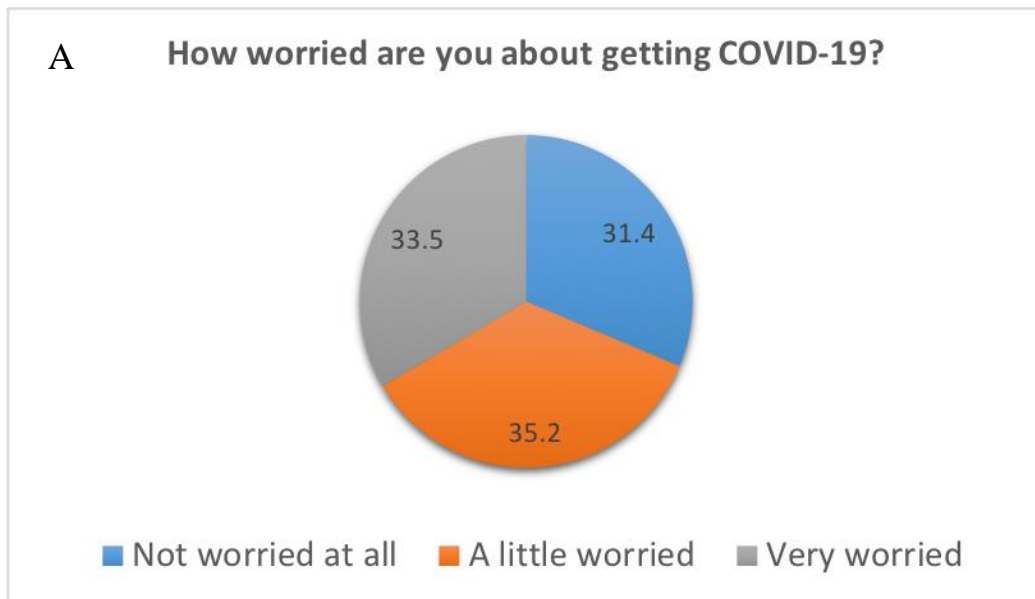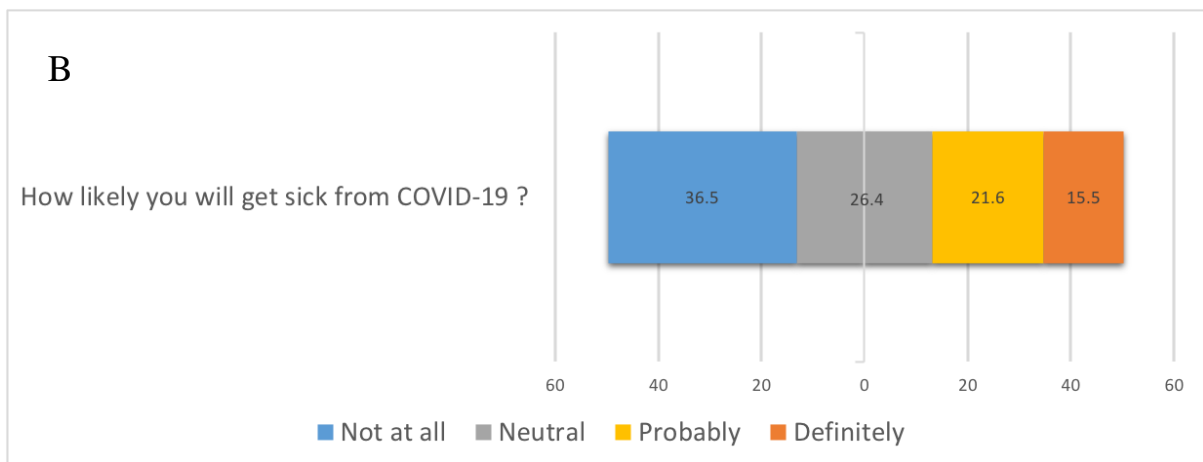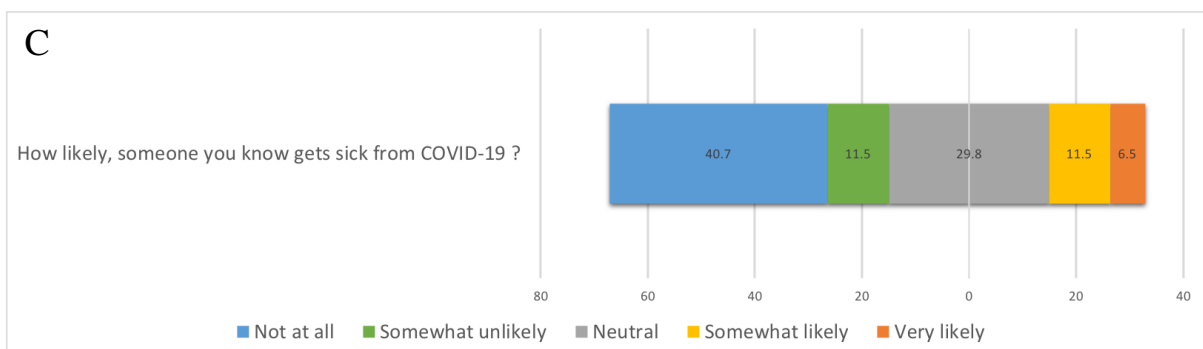



**Supplementary Figure 2:** Summary of Respondents' knowledge on COVID-19 symptoms and relevant safe practices.

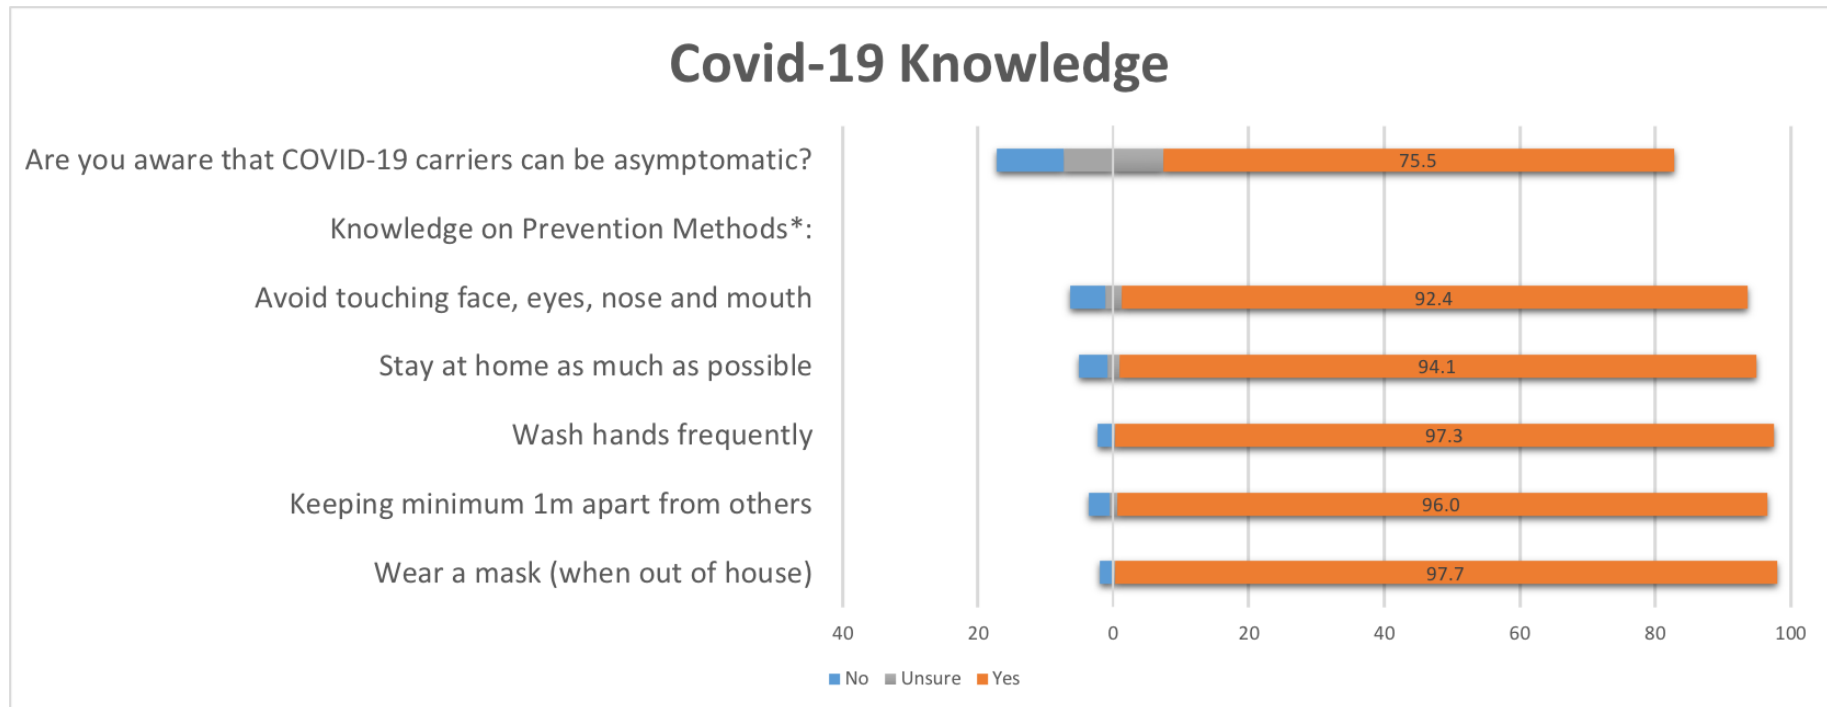

**Supplementary Figure 3:** Respondents' opinion on confidence in government preparedness and individual preparedness in the event of a future outbreak

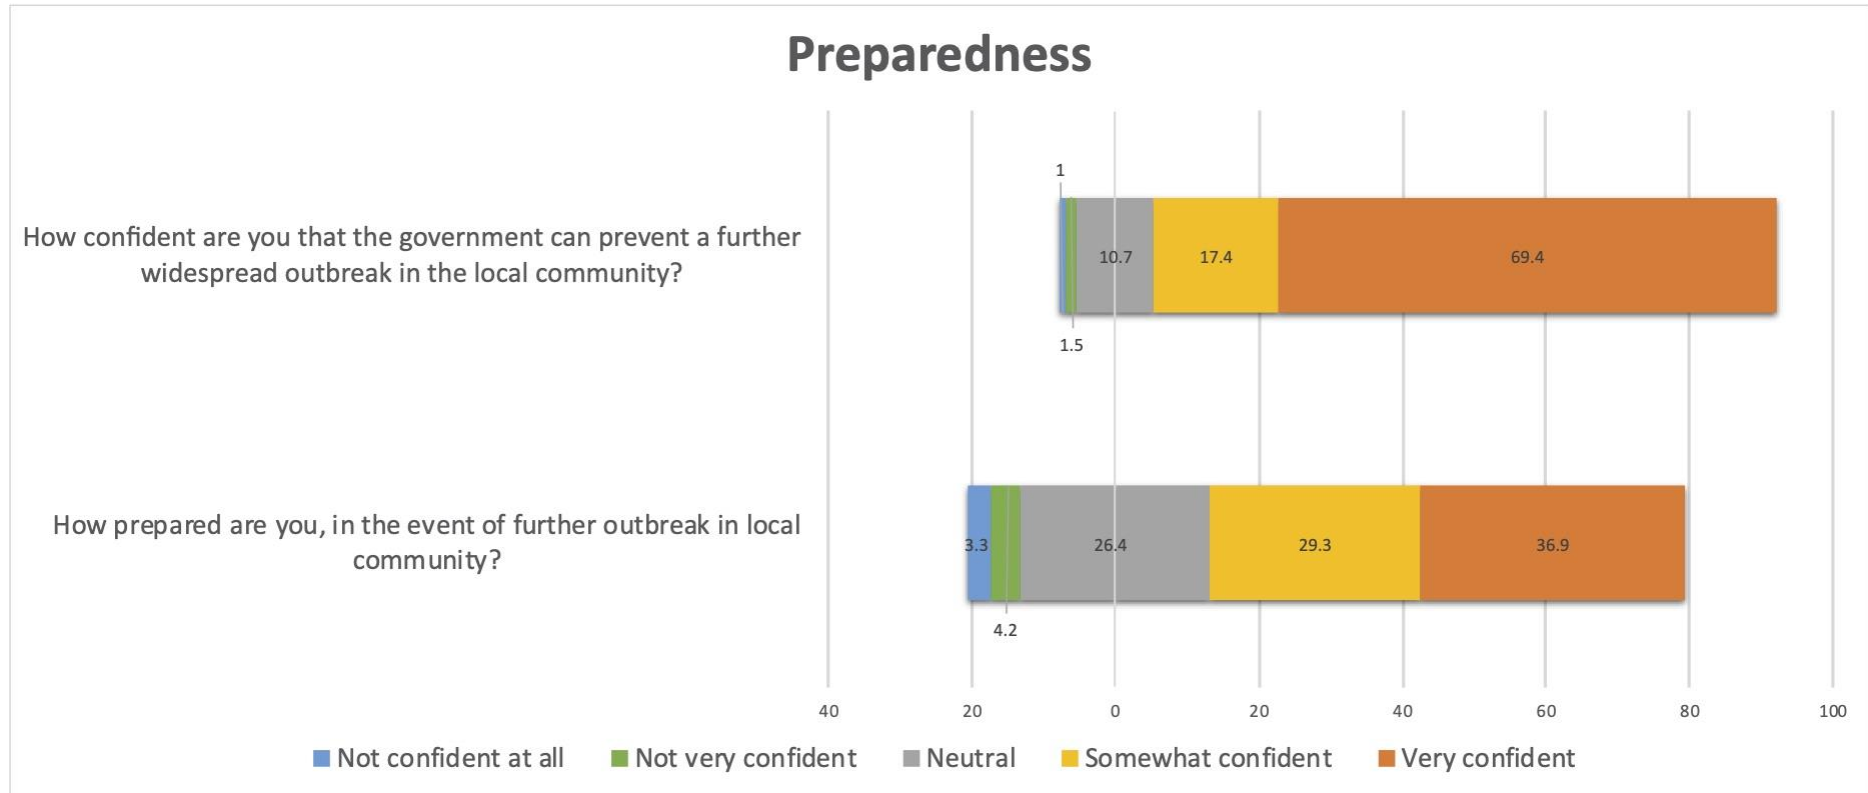

Supplement: 41598_2021_90098_MOESM1_ESM.pdf [file 41598_2021_90098_MOESM1_ESM.pdf]
